# Supplementary material for: H-USY and H-ZSM-5 zeolites as catalysts for HDPE conversion under a hydrogen reductive atmosphere
Source: Royal Society of Chemistry journal article supplement (doi:10.1039/d0se01584a), 2021-01-01
Supplement: d0se01584a1.pdf [file d0se01584a1.pdf]

# H-USY and H-ZSM-5 zeolites as catalysts for HDPE conversion under a hydrogen reductive atmosphere

(Supplementary information)

Cátia S. Costa,<sup>a</sup> Marta Munõz,<sup>b</sup> M. Rosário Ribeiro<sup>\*a</sup> and João M. Silva <sup>\*a c</sup>

a. CQE - Instituto Superior Técnico, Universidade de Lisboa, Portugal

b. Departamento de Matemática Aplicada, Ciencia e Ingeniería de los Materiales y Tecnología Electrónica, Universidad Rey Juan Carlos, 28933-Madrid, Spain.

c. Chemical Engineering Department, Instituto Superior de Engenharia de Lisboa, Instituto Politécnico de Lisboa, Portugal

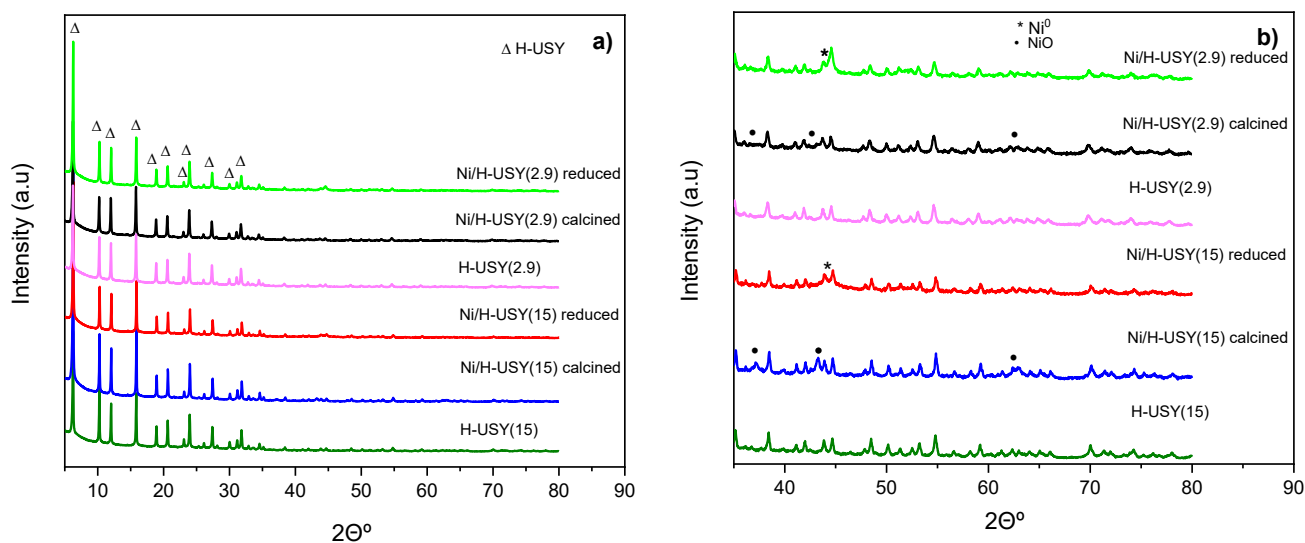

Figure S.1- PXRD diffractograms of calcined and reduced Ni/H-USY (b) Identification of NiO and Ni<sup>0</sup> species on XRD diffractograms.

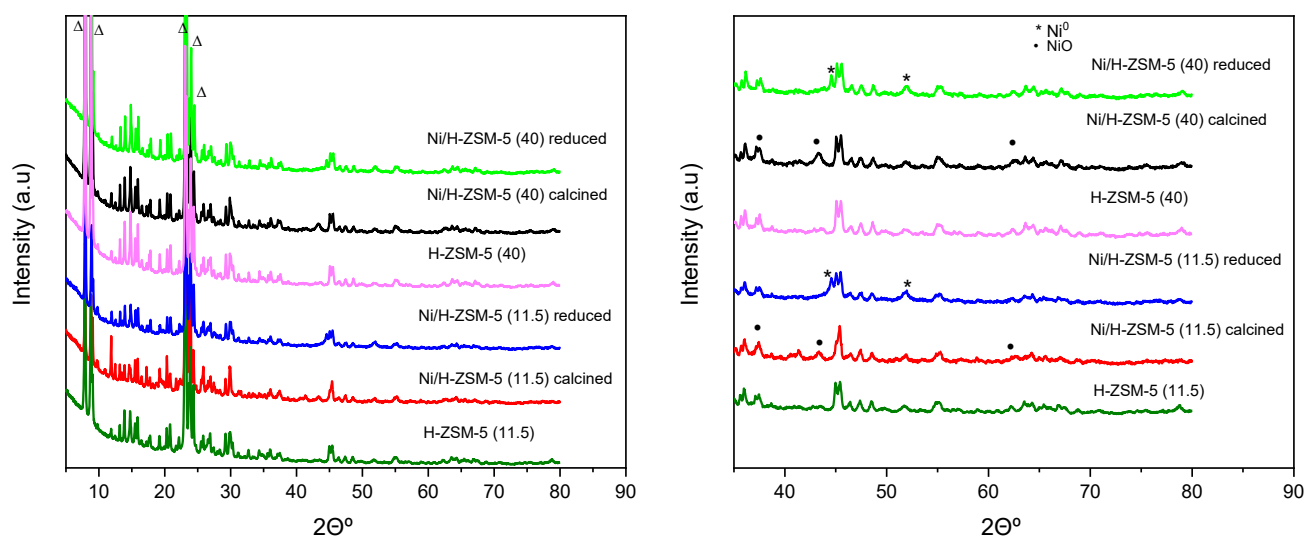

Figure S.2- PXRD diffractograms of calcined and reduced Ni/H-ZSM-5 (b) Identification of NiO and Ni<sup>0</sup> species on XRD diffractograms.

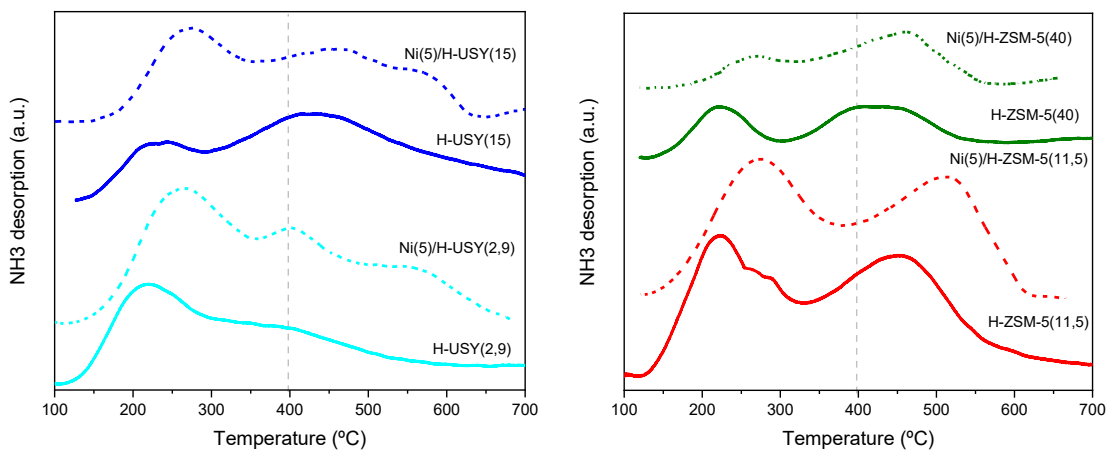

Figure S.3-  $\text{NH}_3$  desorption patterns for parent and Ni based zeolites.

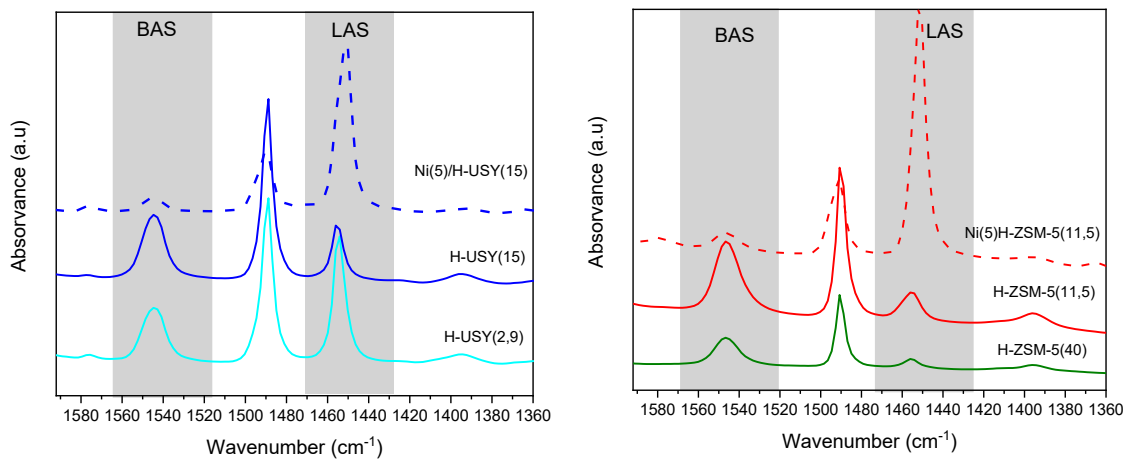

Figure S.4- FTIR spectra of adsorbed pyridine for parent and Ni based H-USY (a) and H-ZSM-5 (11.5)

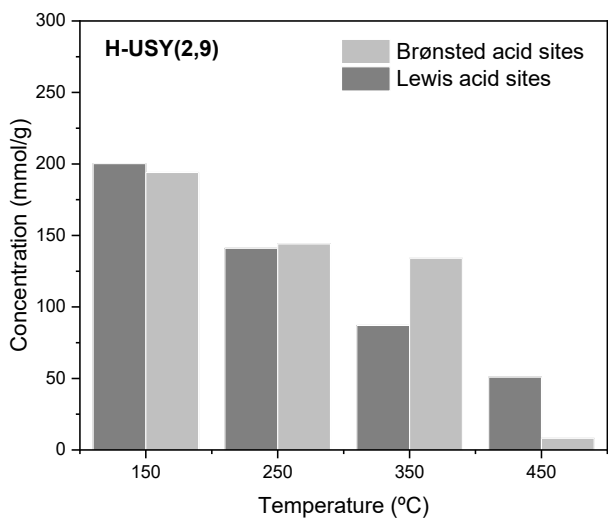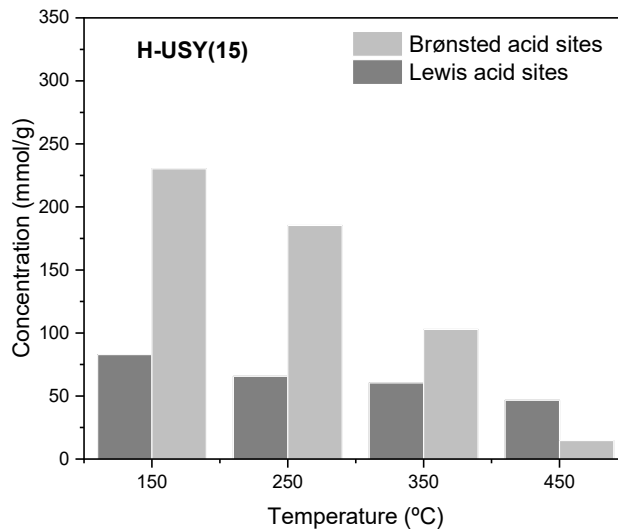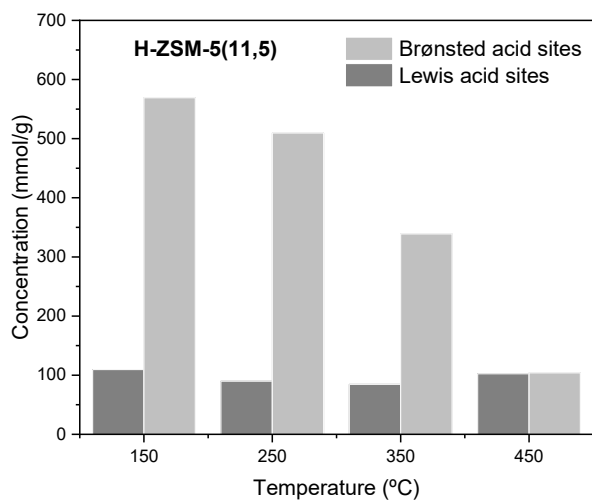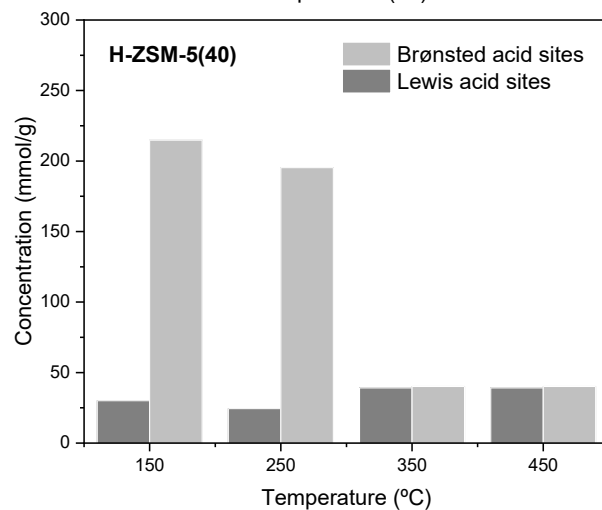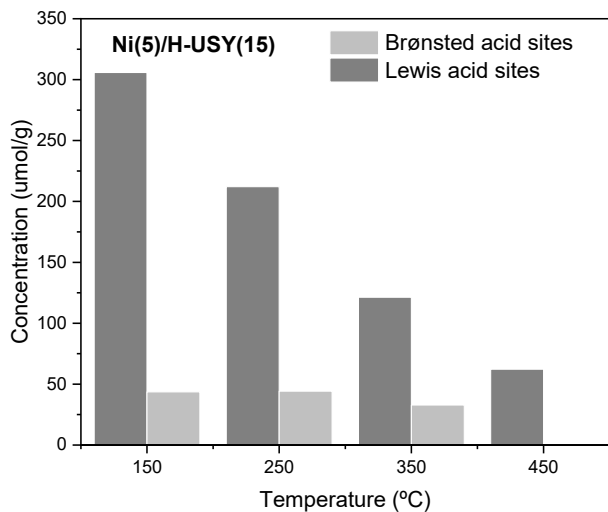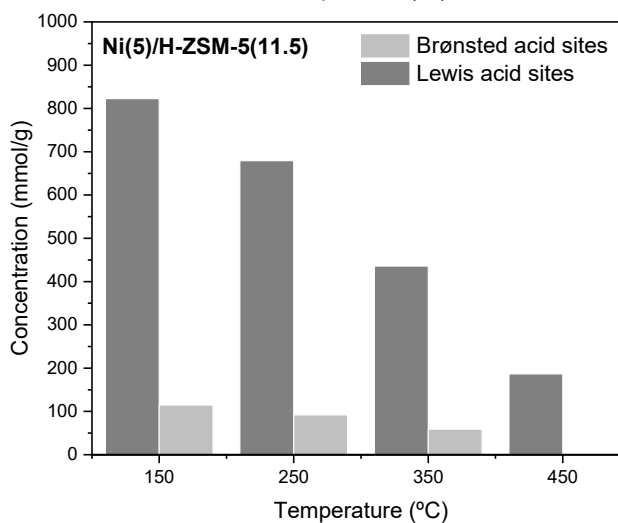

Figure S.5- Concentration of Lewis and Brønsted acid sites for distinct pyridine desorption temperatures.

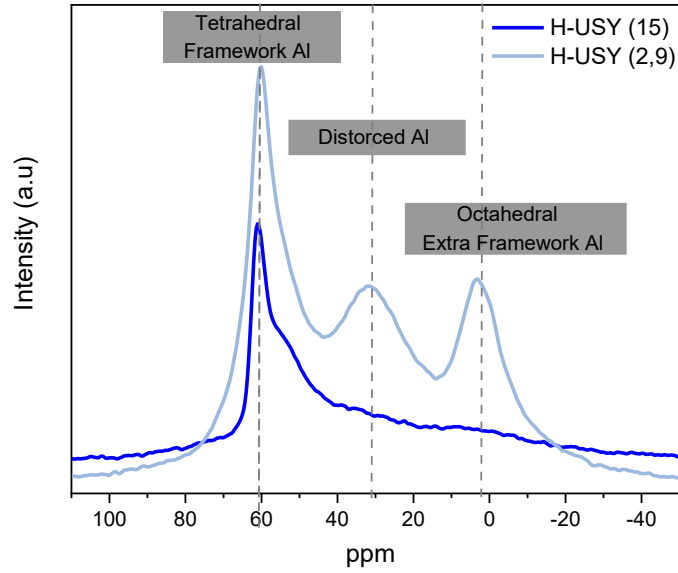

Figure S.6-  $^{27}\text{Al}$  MAS NMR of H-USY (2,9) and H-USY (15)

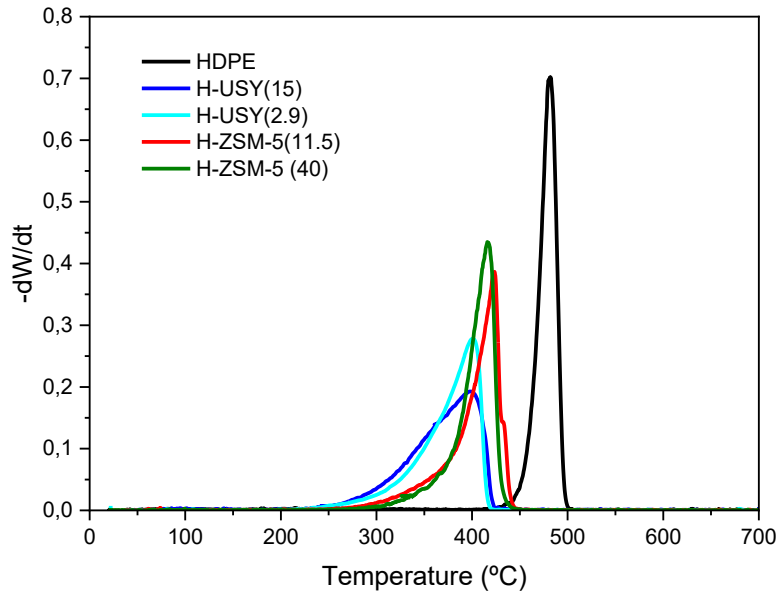

Figure S.7- DTG profiles obtained to HDPE hydrocracking in presence and absence of zeolites.
